# Supplementary material for: Source Term Derivation and Radioactive Release Evaluation for JRTR Research Reactor under Severe Accident
Source: Hindawi journal article supplement (doi:10.1155/2020/1868965), 2020-07-20
Supplement: f1 [file 1868965.f1.docx]

**Appendix 1**

The complete list of the JRTR reactor core fission products inventory (TBq) and the their release fractions

| **Radionuclide** | **Group** | **Half-life (t1/2) [Ref]** | **Core inventory (TBq)** | **Release Fraction** | **Activity released (TBq)** |
| --- | --- | --- | --- | --- | --- |
| xe133 | Noble gas | 5.2475 d | 9.91E+03 | 1.00 | 9.91E+03 |
| xe138 | Noble gas | 14.08 m | 9.61E+03 | 1.00 | 9.61E+03 |
| xe137 | Noble gas | 3.818 m | 9.53E+03 | 1.00 | 9.53E+03 |
| xe139 | Noble gas | 39.68 s | 7.56E+03 | 1.00 | 7.56E+03 |
| kr90 | Noble gas | 32.32 s | 6.90E+03 | 1.00 | 6.90E+03 |
| kr89 | Noble gas | 3.15 m | 6.44E+03 | 1.00 | 6.44E+03 |
| xe140 | Noble gas | 13.60 s | 5.42E+03 | 1.00 | 5.42E+03 |
| kr88 | Noble gas | 2.84 h | 5.06E+03 | 1.00 | 5.06E+03 |
| i134 | Halogen | 52.5 m | 1.21E+04 | 0.40 | 4.84E+03 |
| kr91 | Noble gas | 8.57 s | 4.79E+03 | 1.00 | 4.79E+03 |
| i133 | Halogen | 20.8 h | 1.05E+04 | 0.40 | 4.18E+03 |
| i135 | Halogen | 6.57 h | 9.83E+03 | 0.40 | 3.93E+03 |
| kr87 | Noble gas | 76.3 m | 3.71E+03 | 1.00 | 3.71E+03 |
| cs138 | Alkali metal | 33.41 m | 1.03E+04 | 0.30 | 3.09E+03 |
| cs139 | Alkali metal | 9.27 m | 9.71E+03 | 0.30 | 2.91E+03 |
| xe135 | Noble gas | 9.14 h | 2.86E+03 | 1.00 | 2.86E+03 |
| i132 | Halogen | 2.295 h | 6.93E+03 | 0.40 | 2.77E+03 |
| cs140 | Alkali metal | 63.7 s | 8.64E+03 | 0.30 | 2.59E+03 |
| rb91 | Alkali metal | 58.4 s | 8.06E+03 | 0.30 | 2.42E+03 |
| kr92 | Noble gas | 1.840 s | 2.42E+03 | 1.00 | 2.42E+03 |
| rb92 | Alkali metal | 4.492 s | 6.99E+03 | 0.30 | 2.10E+03 |
| rb89 | Alkali metal | 15.15 m | 6.76E+03 | 0.30 | 2.03E+03 |
| cs141 | Alkali metal | 24.94 s | 6.38E+03 | 0.30 | 1.91E+03 |
| xe135m | Noble gas | 15.29 m | 1.91E+03 | 1.00 | 1.91E+03 |
| i137 | Halogen | 24.5 s | 4.76E+03 | 0.40 | 1.90E+03 |
| rb90 | Alkali metal | 158 s | 6.32E+03 | 0.30 | 1.90E+03 |
| xe141 | Noble gas | 1.73 s | 1.88E+03 | 1.00 | 1.88E+03 |
| i131 | Halogen | 8.02070 d | 4.64E+03 | 0.40 | 1.86E+03 |
| kr85m | Noble gas | 10.776 y | 1.84E+03 | 1.00 | 1.84E+03 |
| i136 | Halogen | 83.4 s | 4.09E+03 | 0.40 | 1.64E+03 |
| rb93 | Alkali metal | 5.84 s | 5.19E+03 | 0.30 | 1.56E+03 |
| rb88 | Alkali metal | 17.78 m | 5.11E+03 | 0.30 | 1.53E+03 |
| cs142 | Alkali metal | 1.70 s | 4.09E+03 | 0.30 | 1.23E+03 |
| br87 | Halogen | 55.60 s | 2.95E+03 | 0.40 | 1.18E+03 |
| br86 | Halogen | 55.1 s | 2.55E+03 | 0.40 | 1.02E+03 |
| br88 | Halogen | 16.34 s | 2.51E+03 | 0.40 | 1.01E+03 |
| i138 | Halogen | 6.49 s | 2.36E+03 | 0.40 | 9.43E+02 |
| i136m | Halogen | 46.9 s | 2.02E+03 | 0.40 | 8.09E+02 |
| kr83m | Noble gas | 1.83 h | 7.97E+02 | 1.00 | 7.97E+02 |
| rb94 | Alkali metal | 2.702 s | 2.46E+03 | 0.30 | 7.39E+02 |
| br85 | Halogen | 2.90 m | 1.83E+03 | 0.40 | 7.32E+02 |
| kr93 | Noble gas | 1.286 s | 7.18E+02 | 1.00 | 7.18E+02 |
| xe142 | Noble gas | 1.22 s | 6.73E+02 | 1.00 | 6.73E+02 |
| cs143 | Alkali metal | 1.78 s | 2.20E+03 | 0.30 | 6.59E+02 |
| br89 | Halogen | 4.348 s | 1.59E+03 | 0.40 | 6.36E+02 |
| br84 | Halogen | 31.80 m | 1.53E+03 | 0.40 | 6.13E+02 |
| rb90m | Alkali metal | 258 s | 1.89E+03 | 0.30 | 5.66E+02 |
| te134 | Tellurium group | 41.8 m | 1.05E+04 | 0.05 | 5.26E+02 |
| i139 | Halogen | 2.29 s | 1.19E+03 | 0.40 | 4.75E+02 |
| rb95 | Alkali metal | 377.5 ms | 1.17E+03 | 0.30 | 3.52E+02 |
| te132 | Tellurium group | 3.204 d | 6.85E+03 | 0.05 | 3.43E+02 |
| br90 | Halogen | 1.91 s | 8.43E+02 | 0.40 | 3.37E+02 |
| i133m | Halogen | 9 s | 7.27E+02 | 0.40 | 2.91E+02 |
| te133 | Tellurium group | 12.5 m | 5.77E+03 | 0.05 | 2.88E+02 |
| i134m | Halogen | 3.60 m | 6.88E+02 | 0.40 | 2.75E+02 |
| te133m | Tellurium group | 55.4 m | 5.21E+03 | 0.05 | 2.61E+02 |
| te135 | Tellurium group | 19.0 s | 5.10E+03 | 0.05 | 2.55E+02 |
| te131 | Tellurium group | 25.0 m | 4.08E+03 | 0.05 | 2.04E+02 |
| sb131 | Tellurium group | 23.03 m | 3.99E+03 | 0.05 | 2.00E+02 |
| cs144 | Alkali metal | 1.01 s | 6.64E+02 | 0.30 | 1.99E+02 |
| ba139 | Alkaline earths | 83.06 m | 9.84E+03 | 0.02 | 1.97E+02 |
| ba140 | Alkaline earths | 12.752 d | 9.40E+03 | 0.02 | 1.88E+02 |
| sr93 | Alkaline earths | 7.423 m | 9.21E+03 | 0.02 | 1.84E+02 |
| sb133 | Tellurium group | 2.5 m | 3.60E+03 | 0.05 | 1.80E+02 |
| sr94 | Alkaline earths | 75.3 s | 8.96E+03 | 0.02 | 1.79E+02 |
| ba141 | Alkaline earths | 18.27 m | 8.92E+03 | 0.02 | 1.78E+02 |
| ba142 | Alkaline earths | 10.6 m | 8.72E+03 | 0.02 | 1.74E+02 |
| sr92 | Alkaline earths | 2.71 h | 8.68E+03 | 0.02 | 1.74E+02 |
| sr91 | Alkaline earths | 9.63 h | 8.47E+03 | 0.02 | 1.69E+02 |
| ba143 | Alkaline earths | 14.33 s | 8.29E+03 | 0.02 | 1.66E+02 |
| sr95 | Alkaline earths | 23.90 s | 7.81E+03 | 0.02 | 1.56E+02 |
| ba144 | Alkaline earths | 11.5 s | 6.51E+03 | 0.02 | 1.30E+02 |
| sr89 | Alkaline earths | 50.53 d | 6.13E+03 | 0.02 | 1.23E+02 |
| sb132m | Tellurium group | 4.10 m | 2.26E+03 | 0.05 | 1.13E+02 |
| sr96 | Alkaline earths | 1.07 s | 5.58E+03 | 0.02 | 1.12E+02 |
| sb132 | Tellurium group | 2.79 m | 2.11E+03 | 0.05 | 1.06E+02 |
| te136 | Tellurium group | 17.5 s | 2.04E+03 | 0.05 | 1.02E+02 |
| se86 | Tellurium group | 15.3 s | 1.86E+03 | 0.05 | 9.29E+01 |
| cs137 | Alkali metal | 30.07 y | 2.88E+02 | 0.30 | 8.64E+01 |
| cs134 | Alkali metal | 2.0648 y | 2.62E+02 | 0.30 | 7.87E+01 |
| sb130m | Tellurium group | 6.3 m | 1.51E+03 | 0.05 | 7.56E+01 |
| se84 | Tellurium group | 3.10 m | 1.50E+03 | 0.05 | 7.52E+01 |
| se85 | Tellurium group | 31.7 s | 1.49E+03 | 0.05 | 7.43E+01 |
| sb130 | Tellurium group | 39.5 m | 1.28E+03 | 0.05 | 6.38E+01 |
| ba145 | Alkaline earths | 4.31 s | 2.88E+03 | 0.02 | 5.75E+01 |
| se87 | Tellurium group | 5.29 s | 1.12E+03 | 0.05 | 5.58E+01 |
| xe131m | Noble gas | 11.934 d | 5.39E+01 | 1.00 | 5.39E+01 |
| sr97 | Alkaline earths | 426 ms | 2.61E+03 | 0.02 | 5.22E+01 |
| te129 | Tellurium group | 69.6 m | 9.13E+02 | 0.05 | 4.57E+01 |
| cs136 | Alkali metal | 13.16 d | 1.23E+02 | 0.30 | 3.68E+01 |
| te131m | Tellurium group | 30 h | 7.19E+02 | 0.05 | 3.60E+01 |
| kr85 | Noble gas | 10.756 y | 3.49E+01 | 1.00 | 3.49E+01 |
| te137 | Tellurium group | 2.49 s | 6.88E+02 | 0.05 | 3.44E+01 |
| cs134m | Alkali metal | 2.903 h | 1.01E+02 | 0.30 | 3.03E+01 |
| sb134 | Tellurium group | 0.78 s | 5.88E+02 | 0.05 | 2.94E+01 |
| ba146 | Alkaline earths | 2.22 s | 1.36E+03 | 0.02 | 2.73E+01 |
| sr98 | Alkaline earths | 0.653 s | 1.23E+03 | 0.02 | 2.45E+01 |
| mo99 | Noble metal | 65.94 h | 9.59E+03 | 0.0025 | 2.40E+01 |
| tc99m | Noble metal | 6.01 h | 8.51E+03 | 0.0025 | 2.13E+01 |
| tc101 | Noble metal | 14.22 m | 8.25E+03 | 0.0025 | 2.06E+01 |
| mo101 | Noble metal | 14.61 m | 8.25E+03 | 0.0025 | 2.06E+01 |
| tc102 | Noble metal | 5.28 s | 7.02E+03 | 0.0025 | 1.75E+01 |
| mo102 | Noble metal | 11.3 m | 7.00E+03 | 0.0025 | 1.75E+01 |
| np239 | Cerium group | 2.3565 d | 2.96E+04 | 0.0005 | 1.48E+01 |
| i130 | Halogen | 12.36 h | 3.57E+01 | 0.40 | 1.43E+01 |
| te127 | Tellurium group | 9.35 h | 2.85E+02 | 0.05 | 1.42E+01 |
| tc103 | Noble metal | 54.2 s | 5.46E+03 | 0.0025 | 1.37E+01 |
| mo103 | Noble metal | 67.5 s | 5.31E+03 | 0.0025 | 1.33E+01 |
| ru103 | Noble metal | 39.26 d | 4.97E+03 | 0.0025 | 1.24E+01 |
| rh103m | Noble metal | 56.12 m | 4.96E+03 | 0.0025 | 1.24E+01 |
| tc104 | Noble metal | 18.3 m | 3.73E+03 | 0.0025 | 9.33E+00 |
| mo104 | Noble metal | 60 s | 3.52E+03 | 0.0025 | 8.81E+00 |
| te129m | Tellurium group | 33.6 d | 1.63E+02 | 0.05 | 8.16E+00 |
| ru105 | Noble metal | 4.44 h | 2.39E+03 | 0.0025 | 5.98E+00 |
| tc105 | Noble metal | 7.6 m | 2.37E+03 | 0.0025 | 5.93E+00 |
| rh105 | Noble metal | 35.36 h | 2.16E+03 | 0.0025 | 5.39E+00 |
| sr90 | Alkaline earths | 28.79 y | 2.69E+02 | 0.02 | 5.39E+00 |
| mo105 | Noble metal |  | 2.06E+03 | 0.0025 | 5.15E+00 |
| rh104 | Noble metal |  | 1.86E+03 | 0.0025 | 4.64E+00 |
| ce143 | Cerium group |  | 8.99E+03 | 0.0005 | 4.50E+00 |
| ce141 | Cerium group |  | 8.32E+03 | 0.0005 | 4.16E+00 |
| tc106 | Noble metal |  | 1.33E+03 | 0.0025 | 3.33E+00 |
| ce145 | Cerium group |  | 5.97E+03 | 0.0005 | 2.98E+00 |
| tc100 | Noble metal |  | 1.03E+03 | 0.0025 | 2.56E+00 |
| ce144 | Cerium group |  | 4.96E+03 | 0.0005 | 2.48E+00 |
| mo106 | Noble metal |  | 9.91E+02 | 0.0025 | 2.48E+00 |
| ce146 | Cerium group |  | 4.58E+03 | 0.0005 | 2.29E+00 |
| te127m | Tellurium group | 109 d | 4.01E+01 | 0.05 | 2.00E+00 |
| y94 | Lanthanides |  | 9.60E+03 | 0.0002 | 1.92E+00 |
| y95 | Lanthanides |  | 9.58E+03 | 0.0002 | 1.92E+00 |
| la140 | Lanthanides |  | 9.52E+03 | 0.0002 | 1.90E+00 |
| nb97 | Lanthanides |  | 9.29E+03 | 0.0002 | 1.86E+00 |
| zr97 | Lanthanides |  | 9.26E+03 | 0.0002 | 1.85E+00 |
| nb100 | Lanthanides |  | 9.19E+03 | 0.0002 | 1.84E+00 |
| la141 | Lanthanides |  | 8.96E+03 | 0.0002 | 1.79E+00 |
| la143 | Lanthanides |  | 8.92E+03 | 0.0002 | 1.78E+00 |
| nb98 | Lanthanides |  | 8.86E+03 | 0.0002 | 1.77E+00 |
| nb97m | Lanthanides |  | 8.78E+03 | 0.0002 | 1.76E+00 |
| pr143 | Lanthanides |  | 8.78E+03 | 0.0002 | 1.76E+00 |
| zr99 | Lanthanides |  | 8.73E+03 | 0.0002 | 1.75E+00 |
| zr98 | Lanthanides |  | 8.68E+03 | 0.0002 | 1.74E+00 |
| tc107 | Noble metal |  | 6.91E+02 | 0.0025 | 1.73E+00 |
| zr100 | Lanthanides |  | 8.64E+03 | 0.0002 | 1.73E+00 |
| zr95 | Lanthanides |  | 8.58E+03 | 0.0002 | 1.72E+00 |
| la144 | Lanthanides |  | 8.18E+03 | 0.0002 | 1.64E+00 |
| nb95 | Lanthanides |  | 7.96E+03 | 0.0002 | 1.59E+00 |
| nb101 | Lanthanides |  | 7.95E+03 | 0.0002 | 1.59E+00 |
| ru106 | Noble metal |  | 6.16E+02 | 0.0025 | 1.54E+00 |
| rb86 | Alkali metal |  | 5.08E+00 | 0.30 | 1.52E+00 |
| y91 | Lanthanides |  | 7.51E+03 | 0.0002 | 1.50E+00 |
| ce147 | Cerium group |  | 2.96E+03 | 0.0005 | 1.48E+00 |
| ce148 | Cerium group |  | 2.41E+03 | 0.0005 | 1.21E+00 |
| y96 | Lanthanides |  | 5.92E+03 | 0.0002 | 1.18E+00 |
| la145 | Lanthanides |  | 5.77E+03 | 0.0002 | 1.15E+00 |
| nb99 | Lanthanides |  | 5.64E+03 | 0.0002 | 1.13E+00 |
| pr144 | Lanthanides |  | 5.02E+03 | 0.0002 | 1.00E+00 |
| zr101 | Lanthanides |  | 4.78E+03 | 0.0002 | 9.56E-01 |
| y97 | Lanthanides |  | 4.64E+03 | 0.0002 | 9.27E-01 |
| pr146 | Lanthanides |  | 4.59E+03 | 0.0002 | 9.18E-01 |
| nb102 | Lanthanides |  | 4.49E+03 | 0.0002 | 8.97E-01 |
| nb99m | Lanthanides |  | 3.83E+03 | 0.0002 | 7.66E-01 |
| pr147 | Lanthanides |  | 3.47E+03 | 0.0002 | 6.93E-01 |
| nd147 | Lanthanides |  | 3.43E+03 | 0.0002 | 6.85E-01 |
| nb103 | Lanthanides |  | 3.30E+03 | 0.0002 | 6.59E-01 |
| y93m | Lanthanides |  | 3.27E+03 | 0.0002 | 6.55E-01 |
| y99 | Lanthanides |  | 3.23E+03 | 0.0002 | 6.46E-01 |
| zr102 | Lanthanides |  | 3.13E+03 | 0.0002 | 6.25E-01 |
| y96m | Lanthanides |  | 3.13E+03 | 0.0002 | 6.25E-01 |
| ce149 | Cerium group |  | 1.22E+03 | 0.0005 | 6.08E-01 |
| y98 | Lanthanides |  | 2.97E+03 | 0.0002 | 5.95E-01 |
| y97m | Lanthanides |  | 2.81E+03 | 0.0002 | 5.61E-01 |
| pr148 | Lanthanides |  | 2.51E+03 | 0.0002 | 5.02E-01 |
| la146 | Lanthanides |  | 2.50E+03 | 0.0002 | 4.99E-01 |
| pm149 | Lanthanides |  | 2.42E+03 | 0.0002 | 4.83E-01 |
| y98m | Lanthanides |  | 1.75E+03 | 0.0002 | 3.50E-01 |
| pr149 | Lanthanides |  | 1.71E+03 | 0.0002 | 3.42E-01 |
| ce150 | Cerium group |  | 6.34E+02 | 0.0005 | 3.17E-01 |
| la147 | Lanthanides |  | 1.40E+03 | 0.0002 | 2.80E-01 |
| nb102m | Lanthanides |  | 1.36E+03 | 0.0002 | 2.72E-01 |
| la146m | Lanthanides |  | 1.13E+03 | 0.0002 | 2.26E-01 |
| pr150 | Lanthanides |  | 1.02E+03 | 0.0002 | 2.04E-01 |
| y100 | Lanthanides |  | 9.90E+02 | 0.0002 | 1.98E-01 |
| zr103 | Lanthanides |  | 8.12E+02 | 0.0002 | 1.62E-01 |
| te125m | Tellurium group |  | 3.20E+00 | 0.05 | 1.60E-01 |
| nd151 | Lanthanides |  | 7.26E+02 | 0.0002 | 1.45E-01 |
| nb104 | Lanthanides |  | 7.04E+02 | 0.0002 | 1.41E-01 |
| la148 | Lanthanides |  | 5.59E+02 | 0.0002 | 1.12E-01 |
| nb104m | Lanthanides |  | 5.46E+02 | 0.0002 | 1.09E-01 |
| ar41 | Noble gas |  | 2.5302E-30 | 1.00 | 2.53E-30 |
| ar39 | Noble gas |  | 5.55668E-34 | 1.00 | 5.56E-34 |
| ar37 | Noble gas |  | 4.93533E-36 | 1.00 | 4.94E-36 |
